# Supplementary material
Source: Springer Nature journal article supplement (https://www.springermedizin.de/resource/supplementary/12981_2011_209_MOESM3_ESM.pdf/9604056)

After 10 weeks

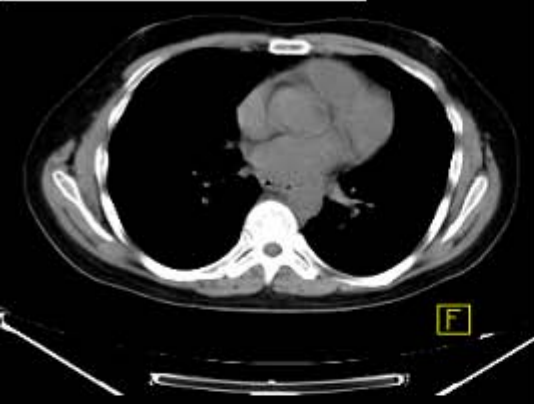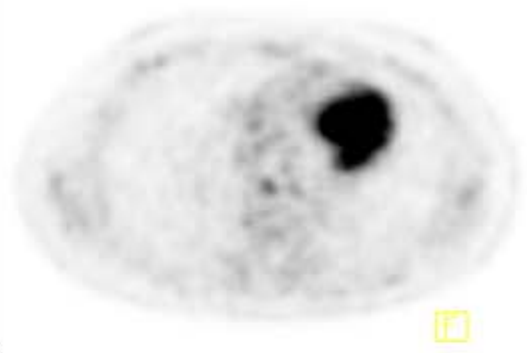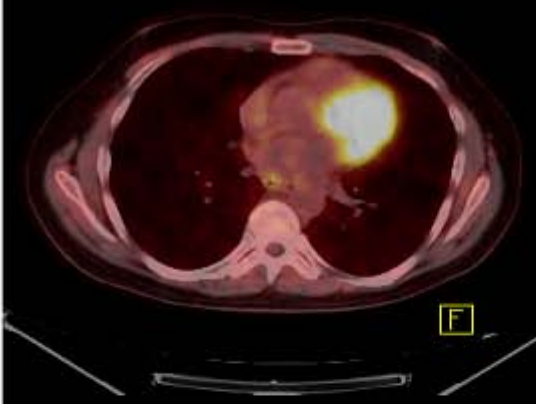

After 3 weeks

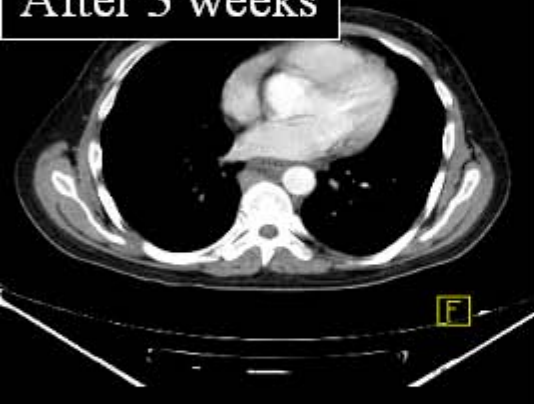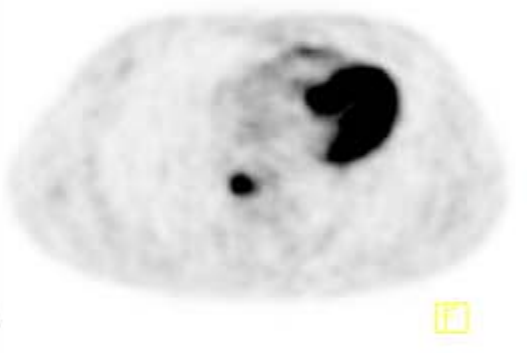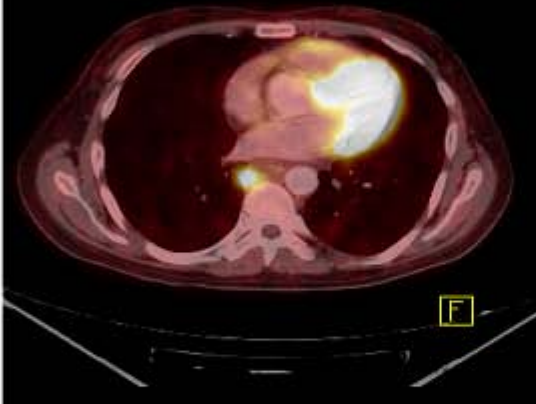

Baseline PET/CT scan

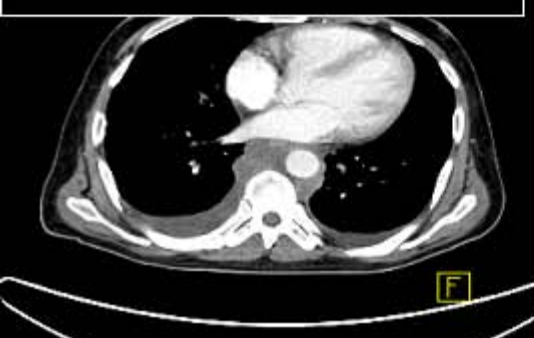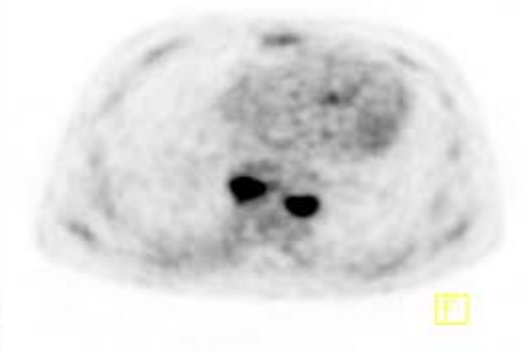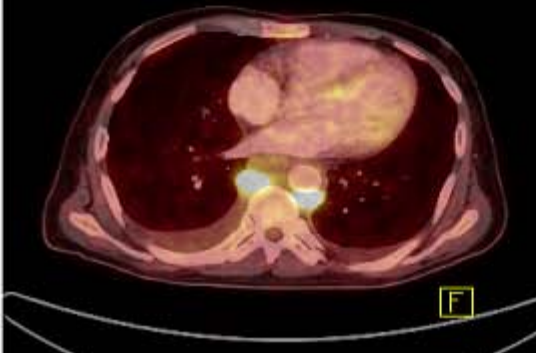

Supplement: MOESM3 [file 9604056]
